# Supplementary material
Source: PubMed Central journal article supplement (PMC2818409)
Supplement: NIHMS157144-supplement-1_si_001.pdf [file NIHMS157144-supplement-1_si_001.pdf]

## Supporting Information

### Nylon-3 co-polymers that generate cell-adhesive surfaces identified by library screening

Myung-ryul Lee, Shannon S. Stahl, Samuel H. Gellman and Kristyn S. Masters

#### General Methods.

Chemicals, including polyethylene glycol (Mn 3400, 202444), *O*-(2-aminoethyl)polyethylene glycol 3000 (07969), *O,O'*-bis(2-aminoethyl)polyethylene glycol (Mw 3000, 14502), and chambered coverslips (C7735) were purchased from Sigma-Aldrich, amine-functionalized glass (SMM2) from ArrayIt, collagen (PureCol™) from Inamed Biomaterials, Irgacure 2959 from Ciba, Dulbecco's Modified Eagle's Media (DMEM), LIVE/DEAD viability/cytotoxicity kit (L3224), Quant-iT™ picogreen dsDNA Assay kit (P7589) and NanoOrgane Protein Quantitation Kit (N666) from Invitrogen, Syringe Prefilter plus GF Prefilter with 0.2 C.A. membrane (sterile filter, 192-2520) from Nalgene, round cover glasses (12-545-80 12CIR.-1) from Fisher Scientific.

After they had been seeded on a surface and allowed to grow for a designated time, NIH 3T3 cells were stained with the LIVE/DEAD kit and scanned using a GeneTAC UC 4x4 scanner (Genomic Solution). All scanned data were analyzed using the GeneTAC quantitation program or the GenePix Pro 6.0 demo version.

$\beta$ -Lactams used for polymer synthesis, **CH**<sup>1</sup>, **CO**<sup>2</sup>, **MM**<sup>3</sup>, **DM**<sup>3b</sup> and **DH**<sup>4</sup>, were prepared according to reported procedures.

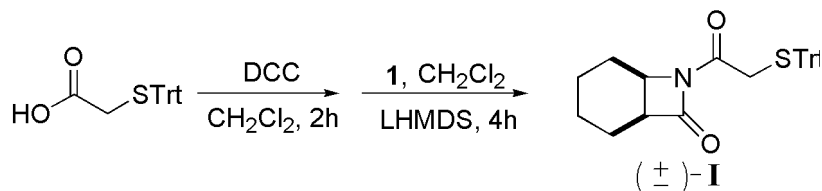

**Co-initiator I.** To a stirred solution of tritylthioacetic acid (8.9 g, 26.8 mmol) in dry  $\text{CH}_2\text{Cl}_2$  (190 mL) was added DCC (2.8 g, 13.4 mmol). After 2 h, the reaction mixture was filtered through celite to remove the urea by-product and rinsed with  $\text{Et}_2\text{O}$ . The filtrate was concentrated *in vacuo*. To a stirred solution of the resulting residue and **CH** (1.5 g, 12.1 mmol) in dry  $\text{CH}_2\text{Cl}_2$  (40 mL) was added 1 N lithium bis-

(trimethylsilyl)amide (12 mL) in THF. After 4 h, the reaction mixture was diluted with EtOAc and washed with 1 N HCl, sat. aq. NaHCO<sub>3</sub> and then brine. The organic layer was dried (MgSO<sub>4</sub>) and concentrated *in vacuo*. The crude product was purified by SiO<sub>2</sub> column chromatography (6:1 to 3:1 hexane/EtOAc containing 1% Et<sub>3</sub>N) to give **I** in 34% yield as a solid.: mp 156-159 °C; <sup>1</sup>H NMR (300 MHz, CD<sub>3</sub>OD) δ 7.48-7.38 (m, 6 H), 7.34-7.16 (m, 9 H), 4.09-4.01 (m, 1 H), 3.49-3.36 (m, 2 H), 3.24-3.14 (m, 1 H), 2.06-1.93 (m, 1 H), 1.91-1.62 (m, 3 H), 1.59-1.38 (m, 4 H); <sup>13</sup>C NMR (75 MHz, CD<sub>3</sub>OD) δ 168.7, 166.6, 144.2, 129.7, 128.0, 126.9, 67.2, 49.8, 46.5, 36.8, 23.1, 19.4, 18.9, 16.9; HRMS (m/z, ESI) calcd for C<sub>14</sub>H<sub>19</sub>NO<sub>4</sub> (M+Na)<sup>+</sup> 464.1655, found 464.1676.

**PEG-Diacrylate.** To a stirred solution of polyethylene glycol (2 g, 0.59 mmol) in dry CH<sub>2</sub>Cl<sub>2</sub> was added Et<sub>3</sub>N (0.18 g, 1.77 mmol) and acryloyl chloride (0.16 g, 1.77 mmol) at 0°C. After 24 h at room temperature, the reaction mixture was poured into Et<sub>2</sub>O (400 mL). The precipitated solid was isolated by filtration and dried. After drying, the crude product was dissolved in deionized water (20 mL) and dialyzed to remove Et<sub>3</sub>NHCl and minor impurities using 1 L deionized water (2 x 8 h). After dialysis, the solution was lyophilized to give PEG-diacrylate in 85% yield as a solid.: <sup>1</sup>H NMR (300 MHz, CDCl<sub>3</sub>) δ 6.42 (dd, 1 H, *J* = 17.4, 1.5 Hz), 6.15 (dd, 1 H, *J* = 17.4, 10.5 Hz), 5.83 (dd, 1 H, *J* = 10.8, 1.8 Hz), 4.34-4.27 (m, 2 H), 3.91-3.37 (m, 219 H).

**Nylon-3 polymer synthesis and characterization.** Polymers Pol-1 to Pol-20 were prepared using reported procedures<sup>3</sup>. The side chain-protected forms of these polymers were analyzed by GPC using a Wyatt MALS and RI detection system (Figure S1). Polymer molecular weights were calculated using ASTRA 5.3.2.15 software. In order to calculate the number-averaged molecular weight (M<sub>n</sub>) and polydispersity index (PDI), a dn/dc value 0.1 ml/g was used for all polymers. This value was chosen based on dn/dc measurements made with six selected copolymers (protected members from the CH+MM and DH+MM sets) (Table S1).

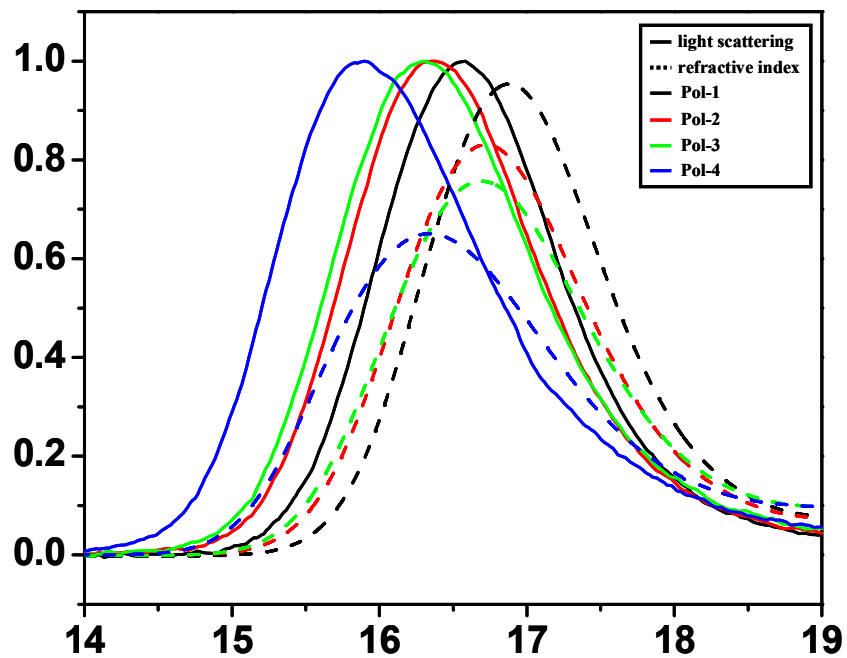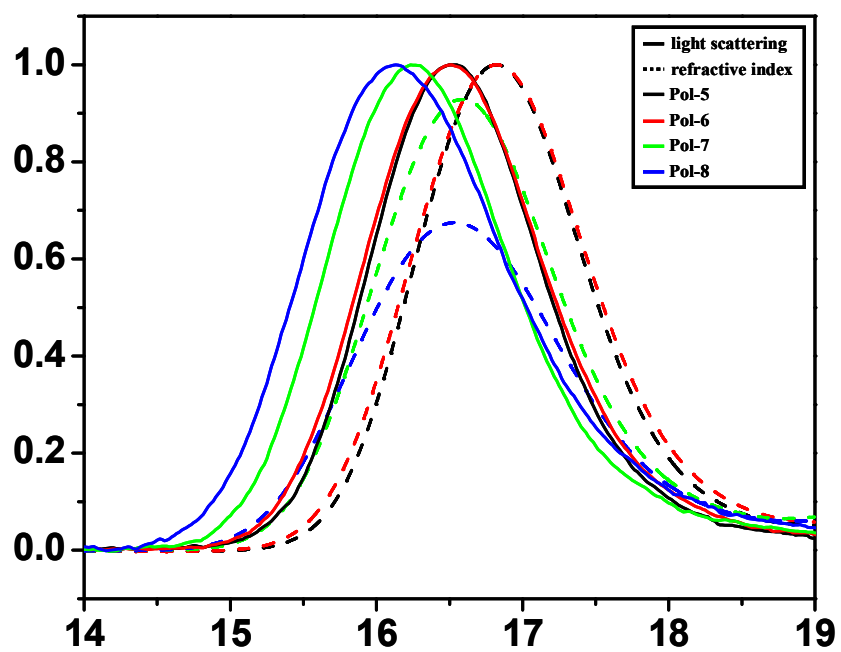

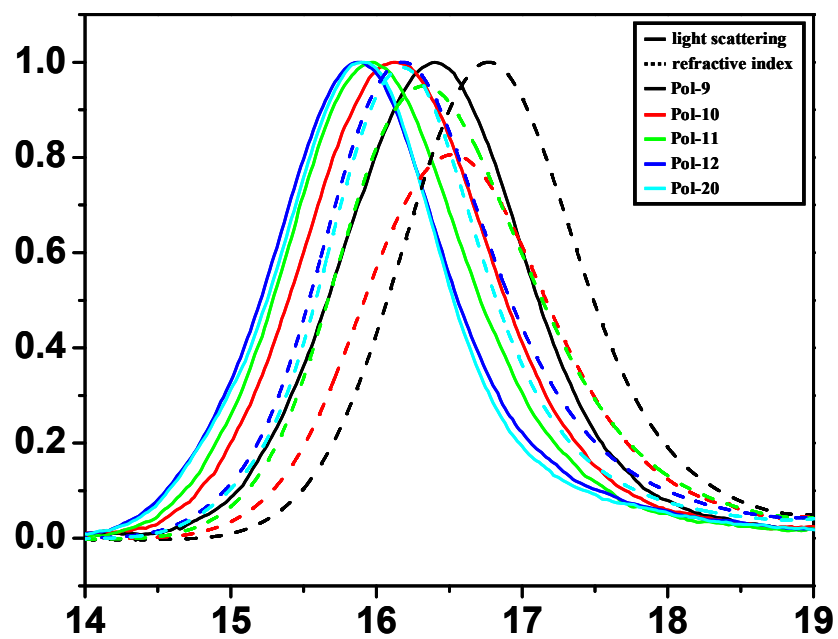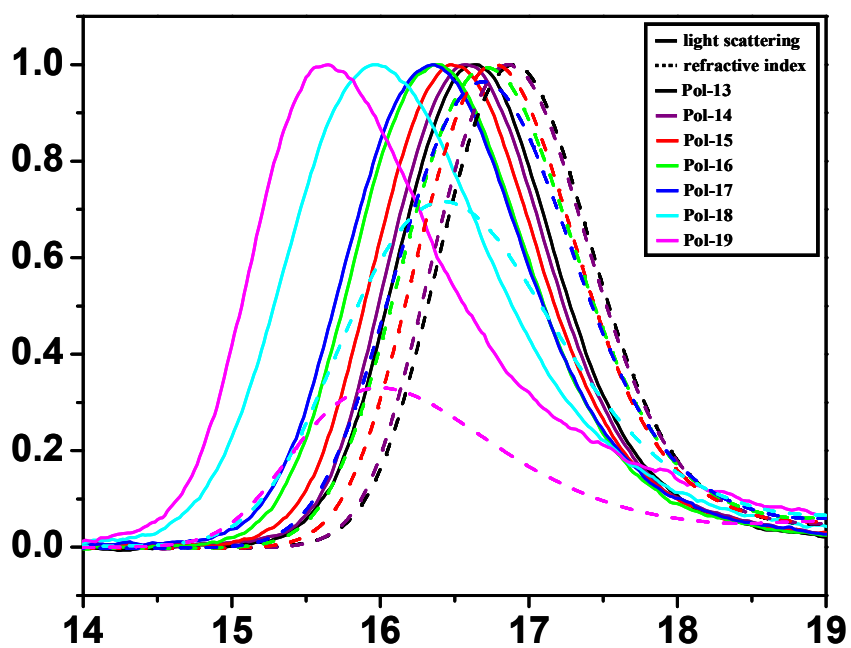

Figure S1. GPC data of polymers Pol-1 to Pol-20

| polymer | exp residue | cal residue | Mn   | Mw   | PDI  | Mn(TFA salt) |
|---------|-------------|-------------|------|------|------|--------------|
| Pol-1   | 21          | 25          | 4675 | 5671 | 1.21 | 4630         |
| Pol-2   | 21          | 26          | 5038 | 6114 | 1.21 | 5034         |
| Pol-3   | 21          | 24          | 4852 | 5942 | 1.23 | 4860         |
| Pol-4   | 21          | 26          | 5634 | 7013 | 1.25 | 5708         |
| Pol-5   | 21          | 26          | 5125 | 6318 | 1.23 | 5089         |
| Pol-6   | 21          | 24          | 4921 | 6005 | 1.22 | 4901         |
| Pol-7   | 21          | 27          | 5604 | 6747 | 1.20 | 5646         |
| Pol-8   | 21          | 26          | 5658 | 6806 | 1.20 | 5729         |
| Pol-9   | 21          | 22          | 4271 | 5962 | 1.40 | 4199         |
| Pol-10  | 21          | 23          | 4760 | 6577 | 1.38 | 4731         |
| Pol-11  | 21          | 23          | 5103 | 7039 | 1.38 | 5110         |
| Pol-12  | 21          | 28          | 6253 | 7945 | 1.27 | 6344         |
| Pol-13  | 21          | 25          | 5321 | 6422 | 1.21 | 4639         |
| Pol-14  | 21          | 24          | 5117 | 5372 | 1.25 | 4579         |
| Pol-15  | 21          | 24          | 5253 | 6221 | 1.18 | 4833         |
| Pol-16  | 21          | 23          | 4986 | 6251 | 1.25 | 4694         |
| Pol-17  | 21          | 22          | 4962 | 6172 | 1.25 | 4786         |
| Pol-18  | 21          | 26          | 5848 | 7216 | 1.23 | 5822         |
| Pol-19  | 21          | 39          | 8597 | 9918 | 1.15 | 8884         |
| Pol-20  | 21          | 26          | 6250 | 7894 | 1.26 | 6361         |

**Table S1.** Molecular weight (Mn, Mw) and PDI of the side chain-protected forms of polymers Pol-1 to Pol-20. The expected number of subunits ("exp residue") in each case is 21 because 5 mol % of the co-initiator was used in each case, and the co-initiator itself contains one residue. The average number of subunits ("cal residue") was calculated based on Mn measured by GPC and the  $\beta$ -lactam proportion used to prepare the polymer.

**Preparation of functionalized glass surfaces.** Amine-covered glass slides were placed in a staining jar. A 3% solution of succinic anhydride and diisopropylethylamine in DMF (30 mL) was poured into the staining jar, which was then shaken gently for 3 h. After thorough rinsing of the slides with DMF, a 3% solution of DIC and N-hydroxysuccinimide (NHS) in DMF (30 mL) was poured into a staining jar. After gentle shaking for 3 h, the slides were washed with DMF and then dried with N<sub>2</sub> gas. Each dried NHS-activated glass slide was covered with coverslip containing 50 wells. An 8  $\mu$ L aliquot of control solution 1 (5% (v/v) 2-aminoethanol in 100 mM NaHCO<sub>3</sub> containing 15% glycerol), control solution 2 (5% (v/v) ethylenediamine in 100

mM NaHCO<sub>3</sub> containing 15% glycerol), control solution 3 (100 mM NaHCO<sub>3</sub> containing 15% glycerol), control solution 4 (5 % (w/v) H<sub>2</sub>N-PEG-OH (M<sub>w</sub> = 3000) in 100 mM NaHCO<sub>3</sub> containing 15% glycerol), control solution 5 (5% (w/v) H<sub>2</sub>N-PEG-NH<sub>2</sub> (M<sub>w</sub> = 3000) in 100 mM NaHCO<sub>3</sub> containing 15% glycerol) or of a solution containing one among polymers Pol-1 to Pol-20 (1 mM in 100 mM NaHCO<sub>3</sub> containing 15% glycerol) was added into each well (in a predetermined pattern). The glass slide was placed in a water-loaded petri dish humidifying chamber. After 12 h at room temperature, the glass slides were thoroughly washed using a squeeze bottle containing deionized water and then dried with N<sub>2</sub> gas (Figure S2).

To prepare a well containing collagen, an untreated amine-covered glass slide was covered with a coverslip and placed in a Petri dish. An 8 μL aliquot of collagen (1.75 μg/mL in bicarbonate coating buffer) was added into each well. The petri dish was placed in a cold room and incubated 20 h. After incubation, the slide was washed with deionized water (10 uL in each well x 2) and then dried with N<sub>2</sub> gas.

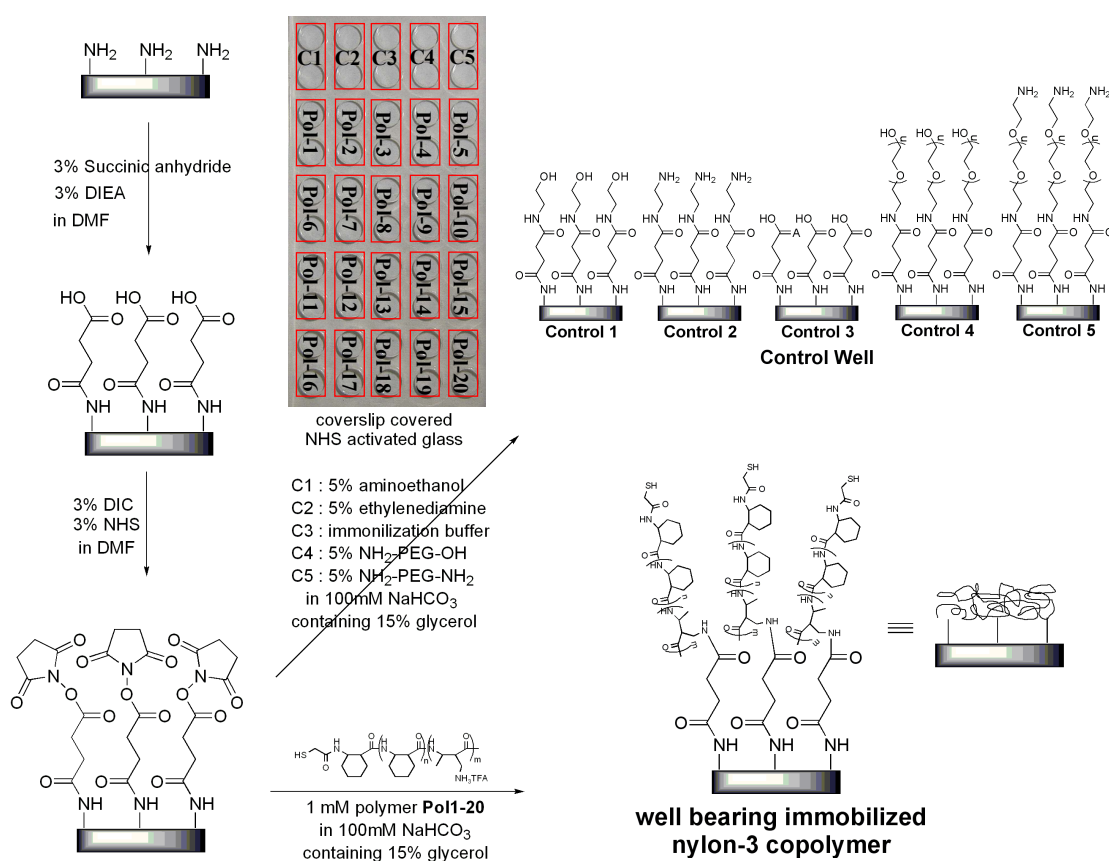

**Figure S2.** Preparation of functionalized glass surfaces

**Screening of NIH 3T3 cell adhesion.** 3T3 cells were cultured in Dulbecco's Modified Eagle's Medium (DMEM) supplemented with 10 % fetal bovine serum, 1% penicillin/streptomycin and 1% L-glutamine at 37 °C for 4–5 days. Cells were detached from the TCPS surface using 1% trypsin and collected using centrifugation. The collected cells were suspended in cell culture medium and diluted to the desired density (125000 cells/mL). For experiments conducted without serum, DMEM supplemented with only 1% penicillin/streptomycin and 1% L-glutamine was used. An 8  $\mu$ L aliquot of cell suspension was added into each well on the glass slide, which had been placed in a petri dish. After incubation for 2 h, the petri dish was filled with culture medium (25-30 mL). After 1 day, excess culture medium was removed by vacuum suction without removing the medium in the wells. A solution of LIVE/DEAD staining fluorescence dye (Ethidium Homodimer-1 (2  $\mu$ L, final 4 mM) and Calcein AM (0.5  $\mu$ L, final 2mM) in PBS (650  $\mu$ L)) was added to the coverslip. After 20 min, the adhered cells in the well were quantitatively analyzed using a GeneTAC UC 4x4 scanner, and then photos were obtained using a fluorescence microscope (Figure S3).

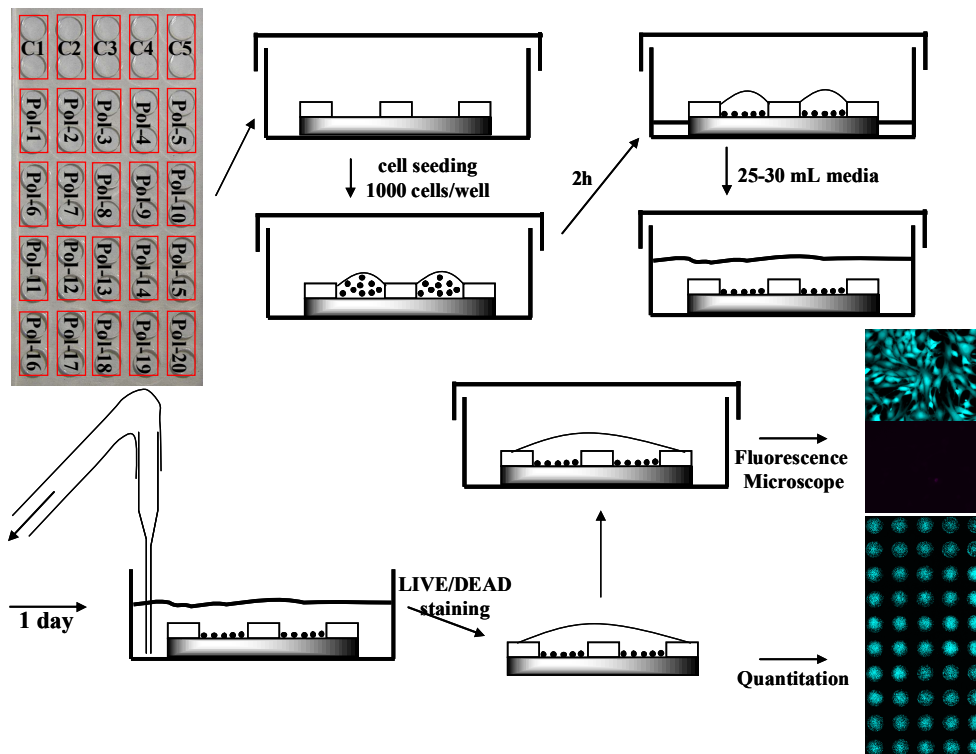

**Figure S3.** Screening of functionalized glass surfaces for NIH 3T3 cell adhesion.

**Quantification of adsorbed serum protein.** A BSA standard curve was generated as follows. A stock solution of 2 mg/mL BSA was diluted 200-fold with 1 X

NanoOrange working solution to generate a 10  $\mu\text{g/mL}$  BSA solution, which was further diluted with 1 X NanoOrange working solution to generate 1, 2.5, 5.0, and 7.5  $\mu\text{g/mL}$  standard solutions. An untreated amine-covered glass slide was covered with a coverslip, and then 10  $\mu\text{L}$  each standard solution (and of a solution containing no BSA) was added into predetermined wells. After 1 h incubation in a water-loaded Petri dish humidifying chamber at room temperature, the slide was scanned using a GeneTAC UC 4x4 scanner (Figure S4).

The amount of protein on glass surfaces exposed to culture medium was then determined as follows. Glass slides with wells having a control modified surface or a surface modified with a polymer (Pol-1 to Pol-20) were placed in a water-loaded Petri dish humidified chamber. An 8  $\mu\text{L}$  aliquot of DMEM supplemented with 10 % fetal bovine serum, 1% penicillin/streptomycin and 1% L-glutamine was added into each well. After 30 min, one slide was washed with deionized water (10  $\mu\text{L}$  in each well x 2) and then dried with  $\text{N}_2$  gas; the other slide was washed and dried similarly after 2 hr. A 10  $\mu\text{L}$  aliquot of 1 X NanoOrange working solution was added to each well. After a 1 h incubation in a water-loaded Petri dish humidifying chamber at room temperature, the slide was scanned using a GeneTAC UC 4x4 scanner (Figure S5).

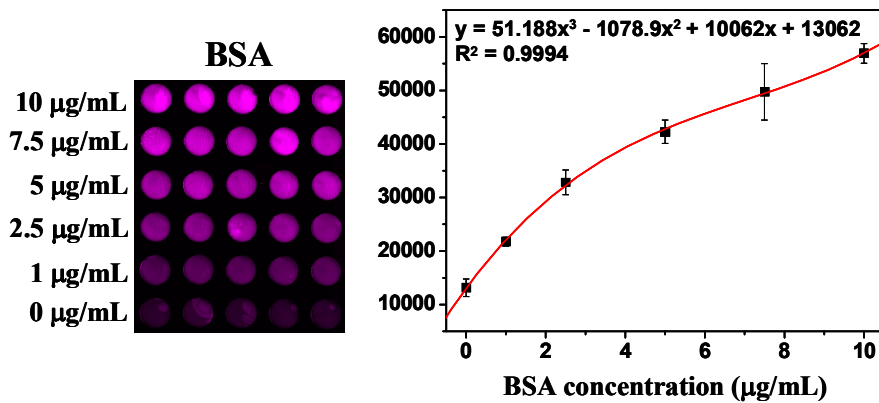

**Figure S4.** Calibration curve for protein adsorption on glass generated via BSA treatment.



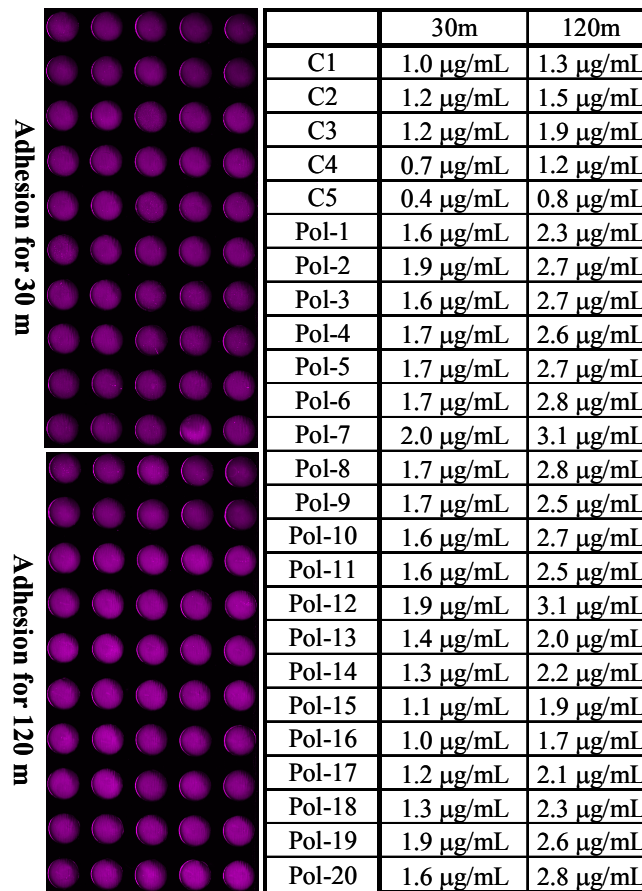

**Figure S5.** Quantification of adsorbed serum protein on modified glass surfaces.

**Cell adhesion on modified PEG hydrogels.** PEG-diacrylate (20% (w/v)) in PBS buffer was sterilized using a sterile filter (Syringe Prefilter plus GF Prefilter with 0.2 C.A. membrane). The PEG hydrogels were prepared as follows. Each hydrogel sample was prepared from a solution containing 280 µL 15% (w/v) sterile PEG-diacrylate and 0.05% photoinitiator. The negative control sample contained no other additive. The positive control sample contained 1 mM CGRGDS. The nylon-3 copolymer samples contained 1 mM of Pol-5, Pol-9 or Pol-15. Each of these solutions (60 µL x 4 for each condition) was loaded into a round cover glass, and then another round cover glass was placed on top. The PEG solutions sandwiched between round cover glasses were placed in a UV reactor and irradiated for 5 min. After polymerization, the upper cover glass was removed, and the cover glasses bearing the hydrogels were placed into a 24-well plate. The PEG hydrogels were preincubated with 500 µL cell culture medium, which was exchanged three times (after 8 h in each case) to remove unreacted solutes. Meanwhile, NIH 3T3 cells were suspended in medium and diluted

to the desired density (200,000 cells/mL). A 500  $\mu$ L aliquot of cell suspension was added into each well. After incubation for 1 day, the culture medium was removed. A 250  $\mu$ L aliquot of LIVE/DEAD staining fluorescence dye solution (Ethidium Homodimer-1 (11  $\mu$ L, final 4 mM) and Calcein AM (2.75  $\mu$ L, final 2 mM) in PBS (5.5 mL)) was added to each well. After 5 min, photographs were obtained with a fluorescence microscope. Then adhered cells are quantified with a picogreen assay. PEG hydrogels were then moved carefully to new wells, and 250  $\mu$ L M-Per (cell lysis solution) was added to each well. After 30-60 min, cell lysates were collected, and 20  $\mu$ L of each lysate was diluted 10-fold with 1 X TE buffer. Meanwhile, DNA standard solutions were prepared by diluting a 100  $\mu$ g/mL DNA stock solution with 1 X TE buffer to make 1, 5, 10, 100, 500 and 1000 ng/mL solutions (minimum 200  $\mu$ L each). A 150  $\mu$ L aliquot of each DNA standard solution, and a 150  $\mu$ L aliquot of each 10-fold diluted cell lysate, along with 150  $\mu$ L 1 X TE buffer (blank) were placed into a 96-well plate. Each solution was mixed with 150  $\mu$ L 1 X picogreen working solution. After incubation 5 min, the fluorescence of each solution was measured using a fluorescence microplate reader.

## References

1. (a) Graf, R.; Lohaus, G.; Böhner, K.; Schmidt, E.; Bestian, H. *Angew. Chem., Int. Ed. Engl.* **1962**, *1*, 481-488. (b) Dener, J. M.; Fantauzzi, P. P.; Kshirsagar, T. A.; Kelly, D. E.; Wolfe, A. B. *Org. Proc. Res. Dev.* **2001**, *5*, 445-449.
2. Goodgame, D. M. L.; Hill, S. P. W.; Lincoln, R.; Quiros, M.; Williams, D. J. *Polyhedron* **1993**, *12*, 2753-2762.
3. (a) Mowery, B. P.; Lee, S. E.; Kissounko, D. A.; Epand, R. F.; Epand, R. M.; Weisblum, B.; Stahl, S. S.; Gellman, S. H. *J. Am. Chem. Soc.* **2007**, *129*, 15474-15476. (b) Zhang, J.; Kissounko, D. A.; Lee, S. E.; Gellman, S. H.; Stahl, S. S. *J. Am. Chem. Soc.* **2009**, *131*, 1589-1597.
4. Lee, M.; Stahl, S. S.; Gellman, S. H. *Org. Lett.* **2008**, *10*, 5317-5319.
